# Supplementary material for: Genes significantly associated with lineage II food isolates of Listeria monocytogenes
Source: BMC Genomics. 2018 Sep 25;19:708. doi: 10.1186/s12864-018-5074-2 (PMC6157050; doi:10.1186/s12864-018-5074-2)
Supplement: Supplementary file 2 — List of stress tolerance genes included in this study. (XLSX 33 kb) [file 12864_2018_5074_MOESM2_ESM.xlsx]

## Sheet: Sheet1
Additional File 2. Stress tolerance genes
Gene Name	Locus Tag	Function	Reference
kat	lmo2785	oxidative stress	Azizoglu and Kathariou, 2010
cadA	lmo1100	cadmium resistance	Begley and Hill 2015
ctsR	LM850658_01075	transcriptional regulator; regulate heat shock genes	Begley and Hill 2015
fur	LMM7_2049	transcriptoional reguators	Begley and Hill 2015
groEL	lmo2068	refolding heat damaged proteins	Begley and Hill 2015
groES	lmo2069	refolding heat damaged proteins	Begley and Hill 2015
hrcA	lmo1475	transcriptional regulator; regulate heat shock genes	Begley and Hill 2015
lisK	LMM7_1464	general stress response	Begley and Hill 2015
lisR	LMM7_1463	general stress response	Begley and Hill 2015
marR	LMM7_0638	transcriptoional reguators	Begley and Hill 2015
perR	LMM7_1772	transcriptoional reguators	Begley and Hill 2015
oppA	LMM7_2612	cold stress	Borezee et al., 2000
clpP	lmo2468	stress/adaptation	Chaturongakul et al., 2008
clpX	lmo1268	stress/adaptation	Chaturongakul et al., 2008
cspD	LMM7_1972	cold stress	Chaturongakul et al., 2008
dnaJ	lmo1472	heat shock protein	Chaturongakul et al., 2008
dnaK	lmo1473	heat shock protein	Chaturongakul et al., 2008
gbuA	LMRG_02114	osmotic stress	Chaturongakul et al., 2008
gbuB	LMRG_02115	osmotic stress	Chaturongakul et al., 2008
gbuC	LMRG_02116	osmotic stress	Chaturongakul et al., 2008
grpE	lmo1474	stress/adaptation	Chaturongakul et al., 2008
ldh	lmo0210	energy stress and cellular metabolism	Chaturongakul et al., 2008
lmo0398	lmo0398	oxidative stress	Chaturongakul et al., 2008
lmo0399	lmo0399	oxidative stress	Chaturongakul et al., 2008
lmo0400	lmo0400	oxidative stress	Chaturongakul et al., 2008
lmo0669	lmo0669	oxidative stress	Chaturongakul et al., 2008
lmo0781	lmo0781	oxidative stress	Chaturongakul et al., 2008
lmo0782	lmo0782	oxidative stress	Chaturongakul et al., 2008
lmo0783	lmo0783	oxidative stress	Chaturongakul et al., 2008
lmo0784	lmo0784	oxidative stress	Chaturongakul et al., 2008
lmo1433	lmo1433	oxidative stress	Chaturongakul et al., 2008
lmo1470	lmo1470	stress/adaptation	Chaturongakul et al., 2008
lmo1601	lmo1601	stress/adaptation	Chaturongakul et al., 2008
lmo1602	lmo1602		Chaturongakul et al., 2008
lmo2230	lmo2230		Chaturongakul et al., 2008
lmo2460	lmo2460	oxidative stress	Chaturongakul et al., 2008
ltrC	LMM7_2442	cold stress	Chaturongakul et al., 2008
pdhB	LMM7_1083	oxidative stress	Chaturongakul et al., 2008
rsbV	lmo0893	regulator of sigB activity	Chaturongakul et al., 2008
rsbW	lmo0894	regulator of sigB activity	Chaturongakul et al., 2008
rsbX	BN389_09250	regulator of sigB activity	Chaturongakul et al., 2008
gadC	lmo2362	acid stress	Chaturongakul et al., 2008; Begley and Hill 2015
gadA	lmo0447	acid stress	Chaturongakul et al., 2008;Begley and Hill 2015
opuCA	LMRG_00880	osmotic stress	Fraser et al., 2003
opuCB	LMRG_00879	osmotic stress	Fraser et al., 2003
opuCC	LMRG_00878	osmotic stress	Fraser et al., 2003
opuCD	LMRG_00877	osmotic stress	Fraser et al., 2003
arcA	lmo0043	acid stress	Gahan and Hill, 2014
arcB	LMHCC_0975	acid stress	Gahan and Hill, 2014
arcC	BN389_00490	acid stress	Gahan and Hill, 2014
argB	lmo1589	acid stress	Gahan and Hill, 2014
argC	lmo1591	acid stress	Gahan and Hill, 2014
argD	lmo1588	acid stress	Gahan and Hill, 2014
argG	lmo2090	acid stress	Gahan and Hill, 2014
argH	lmo2091	acid stress	Gahan and Hill, 2014
argR	lmo1637	acid stress	Gahan and Hill, 2014
uspA	lmo0515	general stress response	Gomez et al., 2011
rpoN	LMM7_2503	osmotic stress;cold stress	Okada et al., 2006
sigL	BN389_24240	cold stress	Raimann et al., 2009
betL	LMM7_2191	osmotic stress;cold stress	Tasara and Stephan 2006
