# Supplementary material for: Genes significantly associated with lineage II food isolates of Listeria monocytogenes
Source: BMC Genomics. 2018 Sep 25;19:708. doi: 10.1186/s12864-018-5074-2 (PMC6157050; doi:10.1186/s12864-018-5074-2)
Supplement: Supplementary file 8 — List of plasmids downloaded from Genbank. (XLSX 9 kb) [file 12864_2018_5074_MOESM8_ESM.xlsx]

## Sheet: Sheet1
Additional File 8. Plasmids downloaded from GenBank
genome associated with plasmid	accession
08-5578	NC_013767
198	NZ_CM008329
2015TE24968	NZ_CP015985
6179	NZ_HG813250
AT3E	NZ_CP023753
CFSAN004330	NZ_CP020834
CFSAN008100	NZ_CP011399
CFSAN010068	NZ_CP014251
CFSAN022990	NZ_CP020829
CFSAN023459	NZ_CP014253
CFSAN023459	NZ_CP014254
FDA00006905	NZ_CP023053
FDA00006907	NZ_CP022021
FDA00011238	NZ_CP023051
FSL J1-208	NZ_CM001470
HPB5415	NZ_CP019166
HPB5622	NZ_CP019168
J1776	NC_022046
J1817	NC_022047
J1926	NC_022051
Lm N1546	NZ_CP013725
N1-011A	NC_022045
R2-502	NC_021828
R479a	NZ_HG813248
SLCC2372	NC_018889
SLCC2482	NC_018888
SLCC2755	NC_014495
